# Supplementary material for: Genetic study links components of the autonomous nervous system to heart-rate profile during exercise
Source: PubMed Central journal article supplement (PMC5832790; doi:10.1038/s41467-018-03395-6), 2018-03-01
Supplement: 41467_2018_3395_MOESM3_ESM.pdf [file 41467_2018_3395_MOESM3_ESM.pdf]

## Description of Additional Supplementary Files

**File Name: Supplementary Data 1**

**Description:** Genome wide association results ( $P < 8.3 \times 10^{-9}$ ) for all 6 traits.

**File Name: Supplementary Data 2**

**Description:** Post hoc sensitivity analyses.

**File Name: Supplementary Data 3**

**Description:** Coding variants in LD with the sentinel SNPs.

**File Name: Supplementary Data 4**

**Description:** eQTLs in LD with the sentinel SNPs.

**File Name: Supplementary Data 5**

**Description:** Results of pathway analyses.

**File Name: Supplementary Data 6**

**Description:** Intersection between the newly identified loci and previously reported heart rate loci.

**File Name: Supplementary Data 7**

**Description:** Intersection between the newly identified loci and any other previously reported GWAS loci.

**File Name: Supplementary Data 8**

**Description:** Lookup of the newly identified loci in GWAS summary results using phenomescanner.

**File Name: Supplementary Data 9**

**Description:** Associations of genome-wide significant SNPs unadjusted, and after adjustments of resting HR, HR-variability and HR-increase.

**File Name: Supplementary Data 10**

**Description:** Polygenic risk score analyses in the UK Biobank cohort.
